# Supplementary material for: Blood python (Python brongersmai) strike kinematics and forces are robust to variations in substrate geometry
Source: Oxford University Press journal article supplement (doi:10.1242/jeb.244456), 2023-01-11
Supplement: jeb244456supp.pdf [file jeb244456supp.pdf]

**Table S1.** Snake strike data from the open and walled setups for all individuals. Superscript a denotes the open setup and superscript b denotes the walled setup. Forces are reported in body weights (BW). FA/V is fore-aft force over vertical force. Avg. = average, accel. = acceleration, dist. = distance, dur. = duration, ind. = individual, lat. = lateral, max. = maximum, str. = strike, thresh. = threshold, vel. = velocity, and vert. = vertical.

| Ind.           | Trial | Max. Fore-aft Force (BW) | Max. Lat. Force (BW) | Max. Vert. Force (BW) | Max. Total Force (BW) | Fore-Aft Impulse (BW*s) | Max. Vel. (m/s) | Max. Accel. (m/s <sup>2</sup> ) | Str. Dist. (m) | Max. Tail Vel. (m/s) | Max. Tail Accel. (m/s <sup>2</sup> ) | Str. Dur. (ms) | Max. Tail Dist. (m) | Max. FA/V Ratio | % Strike > Slip Thresh. |
|----------------|-------|--------------------------|----------------------|-----------------------|-----------------------|-------------------------|-----------------|---------------------------------|----------------|----------------------|--------------------------------------|----------------|---------------------|-----------------|-------------------------|
| 1 <sup>a</sup> | 1     | 0.33                     | 0.14                 | 1.58                  | 1.60                  | 0.15                    | 2.48            | 80.16                           | 0.22           | 0.73                 | 31.48                                | 48             | 0.03                | 0.29            | 0                       |
|                | 2     | 0.51                     | 0.30                 | 1.80                  | 1.88                  | 0.25                    | 2.88            | 104.02                          | 0.24           | 1.98                 | 49.39                                | 44             | 0.14                | 0.29            | 0                       |
|                | 3     | 0.41                     | 0.17                 | 3.74                  | 3.76                  | 0.05                    | 3.38            | 119.90                          | 0.14           | 1.28                 | 28.31                                | 58             | 0.06                | 0.23            | 0                       |
|                | 4     | 0.32                     | 0.28                 | 1.70                  | 1.73                  | 0.06                    | 3.77            | 121.95                          | 0.15           | 0.62                 | 9.33                                 | 56             | 0.06                | 0.29            | 0                       |
|                | 5     | 0.51                     | 0.33                 | 1.86                  | 1.94                  | 0.21                    | 2.20            | 77.18                           | 0.16           | 0.67                 | 18.42                                | 46             | 0.04                | 0.31            | 13                      |
|                | 6     | 0.32                     | 0.27                 | 1.75                  | 1.78                  | 0.13                    | 2.82            | 104.73                          | 0.17           | 1.07                 | 31.21                                | 54             | 0.10                | 0.25            | 0                       |
| 3 <sup>a</sup> | 1     | 0.20                     | 0.30                 | 1.25                  | 1.28                  | 0.06                    | 3.82            | 157.56                          | 0.23           | 1.25                 | 28.45                                | 54             | 0.08                | 0.34            | 22                      |
|                | 2     | 0.42                     | 0.35                 | 1.03                  | 1.14                  | 0.19                    | 4.26            | 148.62                          | 0.18           | 1.20                 | 31.30                                | 44             | 0.10                | 0.13            | 0                       |
|                | 3     | 0.50                     | 0.39                 | 1.05                  | 1.09                  | 0.19                    | 3.82            | 95.32                           | 0.19           | 0.67                 | 25.73                                | 70             | 0.03                | 0.80            | 35                      |
|                | 4     | 0.39                     | 0.37                 | 1.27                  | 1.45                  | 0.12                    | 4.50            | 122.64                          | 0.21           | 0.91                 | 46.92                                | 68             | 0.07                | 0.39            | 20                      |
|                | 5     | 0.41                     | 0.15                 | 1.06                  | 1.12                  | 0.20                    | 3.66            | 102.56                          | 0.19           | 0.84                 | 23.73                                | 40             | 0.09                | 0.48            | 28                      |
| 5 <sup>a</sup> | 1     | 0.44                     | 0.25                 | 1.56                  | 1.62                  | 0.14                    | 3.08            | 96.37                           | 0.12           | 1.30                 | 62.80                                | 42             | 0.09                | 0.17            | 0                       |
|                | 2     | 0.34                     | 0.31                 | 1.64                  | 1.65                  | 0.13                    | 3.63            | 118.40                          | 0.21           | 0.55                 | 14.24                                | 58             | 0.03                | 0.50            | 16                      |
|                | 3     | 0.34                     | 0.16                 | 1.41                  | 1.46                  | 0.14                    | 3.23            | 114.48                          | 0.14           | 0.17                 | 4.00                                 | 48             | 0.01                | 0.27            | 0                       |
|                | 4     | 0.25                     | 0.15                 | 1.59                  | 1.60                  | 0.11                    | 2.54            | 48.89                           | 0.15           | 1.66                 | 59.27                                | 66             | 0.09                | 0.20            | 0                       |
|                | 5     | 0.34                     | 0.20                 | 1.59                  | 1.59                  | 0.12                    | 3.37            | 111.41                          | 0.15           | 0.40                 | 8.22                                 | 58             | 0.04                | 0.26            | 0                       |
|                | 6     | 0.37                     | 0.35                 | 1.43                  | 1.50                  | 0.16                    | 3.75            | 136.83                          | 0.16           | 0.61                 | 25.14                                | 70             | 0.06                | 0.30            | 0                       |
|                | 7     | 0.20                     | 0.21                 | 1.36                  | 1.38                  | 0.09                    | 2.05            | 36.74                           | 0.08           | 0.23                 | 5.28                                 | 68             | 0.02                | 0.15            | 0                       |
| 6 <sup>a</sup> | 1     | 0.39                     | 0.22                 | 1.86                  | 1.89                  | 0.12                    | 3.24            | 89.31                           | 0.24           | 1.82                 | 101.63                               | 54             | 0.07                | 0.29            | 0                       |
|                | 2     | 0.32                     | 0.39                 | 2.03                  | 2.03                  | 0.13                    | 3.49            | 108.69                          | 0.25           | 0.69                 | 21.46                                | 54             | 0.05                | 0.24            | 0                       |
|                | 3     | 0.32                     | 0.44                 | 2.13                  | 2.14                  | 0.17                    | 2.37            | 72.08                           | 0.29           | 1.09                 | 18.74                                | 50             | 0.03                | 0.26            | 0                       |
|                | 4     | 0.31                     | 0.37                 | 2.01                  | 2.04                  | 0.08                    | 3.19            | 86.09                           | 0.32           | 3.89                 | 161.88                               | 52             | 0.22                | 0.31            | 2                       |
|                | 5     | 0.50                     | 0.17                 | 1.98                  | 2.03                  | 0.31                    | 2.16            | 70.91                           | 0.21           | 4.15                 | 190.20                               | 32             | 0.19                | 0.29            | 0                       |

|                      |   |               |               |               |               |               |               |                 |               |               |                 |       |               |               |           |
|----------------------|---|---------------|---------------|---------------|---------------|---------------|---------------|-----------------|---------------|---------------|-----------------|-------|---------------|---------------|-----------|
|                      | 6 | 0.43          | 0.35          | 2.17          | 2.20          | 0.16          | 2.53          | 57.59           | 0.23          | 0.64          | 24.31           | 52    | 0.03          | 0.32          | 5         |
| Avg. <sup>a</sup>    |   | 0.37±<br>0.09 | 0.28±<br>0.09 | 1.70±<br>0.55 | 1.74±<br>0.54 | 0.14±0.<br>06 | 3.18±<br>0.68 | 99.27±<br>29.86 | 0.19±<br>0.05 | 1.18±<br>0.99 | 42.56±<br>46.57 | 54±10 | 0.07±<br>0.05 | 0.31±<br>0.14 | 6±10      |
| 1 <sup>b</sup>       | 1 | 1.55          | 0.98          | 1.99          | 2.01          | 0.41          | 3.55          | 78.91           | 0.31          | 0.09          | 2.08            | 78    | 0.03          | 3.02          | 58        |
|                      | 2 | 1.96          | 1.58          | 2.19          | 2.57          | 0.72          | 3.56          | 138.22          | 0.36          | 2.16          | 90.93           | 54    | 0.05          | 2.14          | 19        |
|                      | 3 | 1.86          | 1.39          | 1.84          | 1.94          | 0.84          | 4.68          | 68.29           | 0.37          | 0.64          | 27.69           | 64    | 0.007         | 0.84          | 39        |
|                      | 4 | 0.76          | 1.06          | 1.51          | 1.86          | 0.31          | 3.42          | 103.11          | 0.18          | 0.49          | 7.48            | 60    | 0.02          | 0.64          | 34        |
|                      | 5 | 0.70          | 0.58          | 2.02          | 2.20          | 0.89          | 4.83          | 81.28           | 0.31          | 0.65          | 6.38            | 94    | 0.09          | 0.32          | 63        |
| 3 <sup>b</sup>       | 1 | 1.70          | 0.94          | 0.99          | 1.98          | 0.50          | 3.96          | 74.85           | 0.22          | 0.68          | 9.61            | 72    | 0.02          | 4.20          | 60        |
|                      | 2 | 1.71          | 0.41          | 1.32          | 1.86          | 0.73          | 3.95          | 58.34           | 0.23          | 0.16          | 21.53           | 60    | 0.01          | 1.31          | 34        |
|                      | 3 | 0.37          | 0.14          | 1.31          | 1.31          | 0.20          | 3.80          | 129.98          | 0.27          | 0.74          | 9.81            | 52    | 0.01          | 0.44          | 58        |
|                      | 4 | 0.49          | 0.58          | 1.26          | 1.29          | 0.16          | 5.74          | 72.00           | 0.32          | 0.66          | 23.85           | 62    | 0.003         | 0.52          | 33        |
|                      | 5 | 0.38          | 1.32          | 1.09          | 1.51          | 0.15          | 4.13          | 83.16           | 0.28          | 0.91          | 38.96           | 74    | 0.05          | 0.37          | 17        |
|                      | 6 | 0.32          | 0.88          | 1.32          | 1.55          | 0.22          | 3.87          | 147.96          | 0.23          | 0.15          | 6.36            | 64    | 0.001         | 1.04          | 70        |
| 5 <sup>b</sup>       | 1 | 0.35          | 0.92          | 1.38          | 1.56          | 0.17          | 3.14          | 84.86           | 0.17          | 0.25          | 7.06            | 46    | 0.02          | 0.27          | 0         |
|                      | 2 | 0.27          | 0.17          | 1.54          | 1.54          | 0.11          | 2.99          | 102.84          | 0.12          | 0.15          | 7.54            | 54    | 0.01          | 0.21          | 0         |
|                      | 3 | 0.20          | 0.70          | 1.24          | 1.37          | 0.09          | 2.40          | 90.75           | 0.10          | 0.22          | 4.14            | 62    | 0.01          | 0.24          | 0         |
|                      | 4 | 0.68          | 0.46          | 2.09          | 2.17          | 0.28          | 2.88          | 97.10           | 0.16          | 0.49          | 13.00           | 54    | 0.02          | 0.58          | 59        |
|                      | 5 | 0.29          | 0.78          | 1.34          | 1.34          | 0.06          | 2.58          | 108.00          | 0.10          | 0.12          | 1.63            | 68    | 0.004         | 0.33          | 9         |
|                      | 6 | 0.33          | 0.43          | 1.38          | 1.43          | 0.14          | 1.82          | 58.82           | 0.08          | 0.17          | 3.60            | 56    | 0.003         | 0.44          | 19        |
| 6 <sup>b</sup>       | 1 | 1.38          | 0.33          | 1.61          | 1.69          | 0.83          | 3.49          | 70.64           | 0.20          | 1.28          | 20.88           | 62    | 0.02          | 3.31          | 67        |
|                      | 2 | 1.14          | 1.88          | 2.02          | 2.08          | 0.27          | 2.33          | 94.28           | 0.26          | 0.79          | 20.46           | 48    | 0.03          | 0.94          | 65        |
|                      | 3 | 1.45          | 1.51          | 2.21          | 2.43          | 0.31          | 4.22          | 138.29          | 0.37          | 0.03          | 0.02            | 58    | 0.004         | 1.54          | 42        |
|                      | 4 | 2.04          | 0.79          | 2.05          | 2.93          | 0.53          | 3.32          | 104.89          | 0.33          | 0.26          | 2.60            | 54    | 0.03          | 0.82          | 48        |
|                      | 5 | 0.52          | 0.13          | 1.88          | 1.91          | 0.25          | 2.59          | 63.71           | 0.23          | 0.62          | 5.48            | 56    | 0.03          | 0.33          | 34        |
|                      | 6 | 0.59          | 1.22          | 1.89          | 1.91          | 0.12          | 2.63          | 71.88           | 0.30          | 0.06          | 0.20            | 52    | 0.01          | 0.43          | 54        |
| Avg.<br><sup>b</sup> |   | 0.92±<br>0.64 | 0.83±<br>0.49 | 1.63±<br>0.38 | 1.85±<br>0.43 | 0.36±0.<br>27 | 3.47±<br>0.91 | 92.27±<br>26.21 | 0.24±<br>0.09 | 0.51±<br>0.49 | 14.41±<br>19.47 | 61±11 | 0.02±<br>0.02 | 1.06±<br>1.09 | 38±2<br>3 |

**Table S2.** Brown-Forsythe modification of Levene's test showing variation per individual, setup, and variable. Note that none of the variables are significant. Forces are reported in body weights (BW). FA/V is fore-aft force over vertical force. Adj. = adjusted, deg. = degrees, dev. = deviation, max. = maximum, and std. = standard.

| Variable                 | Individual | Deg. of Freedom | F-value | p-adj. | Std. Dev. Open | Std. Dev. Walled |
|--------------------------|------------|-----------------|---------|--------|----------------|------------------|
| Max. Fore-aft Force (BW) | 1          | 1,9             | 7.487   | 0.989  | 0.091          | 0.600            |
|                          | 3          | 1,9             | 2.116   | 1      | 0.109          | 0.682            |
|                          | 5          | 1,11            | 0.791   | 1      | 0.076          | 0.167            |
|                          | 6          | 1,10            | 8.019   | 0.801  | 0.074          | 0.571            |
| Max. Lateral Force (BW)  | 1          | 1,9             | 5.365   | 1      | 0.075          | 0.389            |
|                          | 3          | 1,9             | 7.536   | 0.997  | 0.095          | 0.418            |
|                          | 5          | 1,11            | 10.557  | 0.356  | 0.076          | 0.273            |
|                          | 6          | 1,10            | 14.630  | 0.161  | 0.105          | 0.682            |
| Max. Vertical Force (BW) | 1          | 1,9             | 0.390   | 1      | 0.821          | 0.253            |
|                          | 3          | 1,9             | 0.044   | 1      | 0.118          | 0.140            |
|                          | 5          | 1,11            | 0.613   | 1      | 0.111          | 0.306            |
|                          | 6          | 1,10            | 1.581   | 1      | 0.111          | 0.201            |
| Max. Total Force (BW)    | 1          | 1,9             | 0.399   | 1      | 0.818          | 0.282            |
|                          | 3          | 1,9             | 1.341   | 1      | 0.149          | 0.280            |
|                          | 5          | 1,11            | 1.365   | 1      | 0.097          | 0.305            |
|                          | 6          | 1,10            | 3.268   | 1      | 0.107          | 0.451            |
| Fore-aft Impulse (BW)    | 1          | 1,9             | 4.238   | 1      | 0.078          | 0.261            |
|                          | 3          | 1,9             | 1.464   | 1      | 0.060          | 0.235            |
|                          | 5          | 1,11            | 3.011   | 1      | 0.024          | 0.077            |
|                          | 6          | 1,10            | 1.886   | 1      | 0.078          | 0.256            |
| Max. Velocity (m/s)      | 1          | 1,9             | 0.076   | 1      | 0.580          | 0.687            |
|                          | 3          | 1,9             | 0.109   | 1      | 0.355          | 0.741            |
|                          | 5          | 1,11            | 0.131   | 1      | 0.608          | 0.483            |
|                          | 6          | 1,10            | 0.437   | 1      | 0.545          | 0.711            |

|                                            |   |      |        |       |        |        |
|--------------------------------------------|---|------|--------|-------|--------|--------|
| Max. Acceleration (m/s <sup>2</sup> )      | 1 | 1,9  | 0.188  | 1     | 19.081 | 27.788 |
|                                            | 3 | 1,9  | 0.102  | 1     | 27.420 | 35.901 |
|                                            | 5 | 1,11 | 1.237  | 1     | 37.569 | 17.536 |
|                                            | 6 | 1,10 | 1.009  | 1     | 17.839 | 28.157 |
| Strike Distance (m)                        | 1 | 1,9  | 0.583  | 1     | 0.039  | 0.077  |
|                                            | 3 | 1,9  | 2.387  | 1     | 0.019  | 0.040  |
|                                            | 5 | 1,11 | 0.042  | 1     | 0.039  | 0.037  |
|                                            | 6 | 1,10 | 1.939  | 1     | 0.039  | 0.063  |
| Max. Tail Velocity (m/s)                   | 1 | 1,9  | 0.041  | 1     | 0.520  | 0.790  |
|                                            | 3 | 1,9  | 0.099  | 1     | 0.246  | 0.318  |
|                                            | 5 | 1,11 | 3.311  | 1     | 0.563  | 0.134  |
|                                            | 6 | 1,10 | 3.753  | 1     | 1.588  | 0.486  |
| Max. Tail Acceleration (m/s <sup>2</sup> ) | 1 | 1,9  | 0.734  | 1     | 13.567 | 37.131 |
|                                            | 3 | 1,9  | 0.889  | 1     | 9.225  | 12.314 |
|                                            | 5 | 1,11 | 3.630  | 1     | 25.260 | 4.016  |
|                                            | 6 | 1,10 | 12.977 | 0.227 | 76.621 | 9.775  |
| Max. Tail Distance (m)                     | 1 | 1,9  | 0.114  | 1     | 0.039  | 0.032  |
|                                            | 3 | 1,9  | 0.456  | 1     | 0.027  | 0.019  |
|                                            | 5 | 1,11 | 5.916  | 1     | 0.032  | 0.007  |
|                                            | 6 | 1,10 | 3.653  | 1     | 0.084  | 0.010  |
| Max. FA/V Ratio                            | 1 | 1,9  | 5.113  | 1     | 0.030  | 1.143  |
|                                            | 3 | 1,9  | 1.544  | 1     | 0.244  | 1.462  |
|                                            | 5 | 1,11 | 0.291  | 1     | 0.118  | 0.141  |
|                                            | 6 | 1,10 | 3.556  | 1     | 0.030  | 1.107  |
| % Strike > Slip Threshold                  | 1 | 1,9  | 5.551  | 1     | 5.307  | 18.008 |
|                                            | 3 | 1,9  | 3.170  | 1     | 13.115 | 20.334 |
|                                            | 5 | 1,11 | 2.389  | 1     | 6.047  | 23.072 |
|                                            | 6 | 1,10 | 11.450 | 0.376 | 2.041  | 12.941 |

**Table S3.** 95% confidence intervals for all variables and individuals by setup. The walled setup is the base category for setup and individual six is the base category for individual. Bold denotes significance. Forces are reported in body weights (BW). FA/V is fore-aft force over vertical force. Max. = maximum, dist. = distance, std. = standard, and thresh. = threshold.

| Variable                 | Term                      | Estimate | Std. Error | t Ratio | p-value          | Lower 95% | Upper 95% |
|--------------------------|---------------------------|----------|------------|---------|------------------|-----------|-----------|
| Max. Fore-Aft Force (BW) | Intercept                 | 0.653    | 0.056      | 11.66   | <b>&lt;.0001</b> | 0.540     | 0.767     |
|                          | Setup[open]               | -0.281   | 0.056      | -5.03   | <b>&lt;.0001</b> | -0.395    | -0.168    |
|                          | Individual[1]             | 0.231    | 0.099      | 2.33    | <b>0.0252</b>    | 0.030     | 0.431     |
|                          | Individual[3]             | -0.048   | 0.099      | -0.48   | 0.633            | -0.248    | 0.153     |
|                          | Individual[5]             | -0.313   | 0.094      | -3.34   | <b>0.002</b>     | -0.502    | -0.123    |
|                          | Individual[1]*Setup[open] | -0.202   | 0.099      | -2.04   | <b>0.0478</b>    | -0.403    | -0.002    |
|                          | Individual[3]*Setup[open] | 0.059    | 0.099      | 0.59    | 0.557            | -0.142    | 0.259     |
|                          | Individual[5]*Setup[open] | 0.267    | 0.094      | 2.85    | <b>0.007</b>     | 0.078     | 0.457     |
| Max. Lateral Force (BW)  | Intercept                 | 0.562    | 0.049      | 11.5    | <b>&lt;.0001</b> | 0.463     | 0.661     |
|                          | Setup[open]               | -0.284   | 0.049      | -5.8    | <b>&lt;.0001</b> | -0.382    | -0.185    |
|                          | Individual[1]             | 0.121    | 0.087      | 1.4     | 0.171            | -0.054    | 0.296     |
|                          | Individual[3]             | -0.051   | 0.087      | -0.59   | 0.561            | -0.226    | 0.124     |
|                          | Individual[5]             | -0.157   | 0.082      | -1.92   | 0.063            | -0.322    | 0.009     |
|                          | Individual[1]*Setup[open] | -0.152   | 0.087      | -1.75   | 0.087            | -0.327    | 0.023     |
|                          | Individual[3]*Setup[open] | 0.084    | 0.087      | 0.97    | 0.337            | -0.091    | 0.259     |
|                          | Individual[5]*Setup[open] | 0.112    | 0.082      | 1.37    | 0.180            | -0.054    | 0.277     |
| Max. Vertical Force (BW) | Intercept                 | 1.663    | 0.050      | 33.08   | <b>&lt;.0001</b> | 1.562     | 1.765     |
|                          | Setup[open]               | 0.023    | 0.050      | 0.45    | 0.652            | -0.079    | 0.125     |
|                          | Individual[1]             | 0.327    | 0.089      | 3.67    | <b>0.001</b>     | 0.147     | 0.507     |
|                          | Individual[3]             | -0.489   | 0.089      | -5.5    | <b>&lt;.0001</b> | -0.669    | -0.310    |
|                          | Individual[5]             | -0.161   | 0.084      | -1.92   | 0.063            | -0.331    | 0.009     |
|                          | Individual[1]*Setup[open] | 0.059    | 0.089      | 0.66    | 0.513            | -0.121    | 0.239     |
|                          | Individual[3]*Setup[open] | -0.064   | 0.089      | -0.72   | 0.476            | -0.244    | 0.116     |
|                          | Individual[5]*Setup[open] | -0.015   | 0.084      | -0.18   | 0.861            | -0.185    | 0.155     |

|                                       |                           |        |       |       |                  |         |         |
|---------------------------------------|---------------------------|--------|-------|-------|------------------|---------|---------|
| Max. Total Force (BW)                 | Intercept                 | 1.794  | 0.056 | 31.89 | <b>&lt;.0001</b> | 1.680   | 1.908   |
|                                       | Setup[open]               | -0.063 | 0.056 | -1.11 | 0.273            | -0.176  | 0.051   |
|                                       | Individual[1]             | 0.321  | 0.100 | 3.22  | <b>0.003</b>     | 0.119   | 0.522   |
|                                       | Individual[3]             | -0.394 | 0.100 | -3.96 | <b>0.000</b>     | -0.595  | -0.193  |
|                                       | Individual[5]             | -0.239 | 0.094 | -2.54 | <b>0.015</b>     | -0.429  | -0.048  |
|                                       | Individual[1]*Setup[open] | 0.061  | 0.100 | 0.62  | 0.542            | -0.140  | 0.263   |
|                                       | Individual[3]*Setup[open] | -0.121 | 0.100 | -1.22 | 0.232            | -0.322  | 0.080   |
|                                       | Individual[5]*Setup[open] | 0.049  | 0.094 | 0.52  | 0.603            | -0.141  | 0.240   |
| Fore-Aft Impulse (BW)                 | Intercept                 | 0.259  | 0.023 | 11.12 | <b>&lt;.0001</b> | 0.212   | 0.306   |
|                                       | Setup[open]               | -0.113 | 0.023 | -4.86 | <b>&lt;.0001</b> | -0.160  | -0.066  |
|                                       | Individual[1]             | 0.129  | 0.041 | 3.13  | <b>0.003</b>     | 0.046   | 0.213   |
|                                       | Individual[3]             | -0.020 | 0.041 | -0.48 | 0.635            | -0.103  | 0.064   |
|                                       | Individual[5]             | -0.125 | 0.039 | -3.2  | <b>0.003</b>     | -0.204  | -0.046  |
|                                       | Individual[1]*Setup[open] | -0.133 | 0.041 | -3.23 | <b>0.003</b>     | -0.217  | -0.050  |
|                                       | Individual[3]*Setup[open] | 0.026  | 0.041 | 0.63  | 0.533            | -0.057  | 0.109   |
|                                       | Individual[5]*Setup[open] | 0.105  | 0.039 | 2.7   | <b>0.010</b>     | 0.026   | 0.184   |
| Max. Velocity (m/s)                   | Intercept                 | 3.354  | 0.089 | 37.88 | <b>&lt;.0001</b> | 3.175   | 3.533   |
|                                       | Setup[open]               | -0.140 | 0.089 | -1.58 | 0.122            | -0.319  | 0.039   |
|                                       | Individual[1]             | 0.109  | 0.157 | 0.7   | 0.491            | -0.208  | 0.426   |
|                                       | Individual[3]             | 0.772  | 0.157 | 4.93  | <b>&lt;.0001</b> | 0.456   | 1.089   |
|                                       | Individual[5]             | -0.491 | 0.148 | -3.31 | <b>0.002</b>     | -0.790  | -0.191  |
|                                       | Individual[1]*Setup[open] | -0.403 | 0.157 | -2.57 | <b>0.014</b>     | -0.720  | -0.086  |
|                                       | Individual[3]*Setup[open] | 0.027  | 0.157 | 0.17  | 0.867            | -0.290  | 0.343   |
|                                       | Individual[5]*Setup[open] | 0.369  | 0.148 | 2.49  | <b>0.017</b>     | 0.069   | 0.669   |
| Max. Acceleration (m/s <sup>2</sup> ) | Intercept                 | 96.440 | 4.062 | 23.74 | <b>&lt;.0001</b> | 88.225  | 104.656 |
|                                       | Setup[open]               | 4.102  | 4.062 | 1.01  | 0.319            | -4.114  | 12.318  |
|                                       | Individual[1]             | 1.202  | 7.188 | 0.17  | 0.868            | -13.337 | 15.740  |
|                                       | Individual[3]             | 13.419 | 7.188 | 1.87  | 0.069            | -1.119  | 27.958  |
|                                       | Individual[5]             | -3.877 | 6.796 | -0.57 | 0.572            | -17.623 | 9.868   |

|                                            |                           |         |       |       |                  |         |        |
|--------------------------------------------|---------------------------|---------|-------|-------|------------------|---------|--------|
|                                            | Individual[1]*Setup[open] | -0.422  | 7.188 | -0.06 | 0.954            | -14.961 | 14.116 |
|                                            | Individual[3]*Setup[open] | 11.377  | 7.188 | 1.58  | 0.122            | -3.162  | 25.915 |
|                                            | Individual[5]*Setup[open] | -1.933  | 6.796 | -0.28 | 0.778            | -15.679 | 11.812 |
| Strike Distance (m)                        | Intercept                 | 21.749  | 0.682 | 31.87 | <b>&lt;.0001</b> | 0.204   | 0.231  |
|                                            | Setup[open]               | -2.321  | 0.682 | -3.4  | <b>0.002</b>     | -0.037  | -0.009 |
|                                            | Individual[1]             | 2.340   | 1.207 | 1.94  | 0.060            | -0.001  | 0.048  |
|                                            | Individual[3]             | 1.068   | 1.207 | 0.88  | 0.382            | -0.014  | 0.035  |
|                                            | Individual[5]             | -8.543  | 1.142 | -7.48 | <b>&lt;.0001</b> | -0.109  | -0.062 |
|                                            | Individual[1]*Setup[open] | -3.951  | 1.207 | -3.27 | <b>0.002</b>     | -0.064  | -0.015 |
|                                            | Individual[3]*Setup[open] | -0.596  | 1.207 | -0.49 | 0.624            | -0.030  | 0.018  |
|                                            | Individual[5]*Setup[open] | 3.443   | 1.142 | 3.02  | <b>0.005</b>     | 0.011   | 0.058  |
| Max. Tail Velocity (m/s)                   | Intercept                 | 1.046   | 0.095 | 11    | <b>&lt;.0001</b> | 0.853   | 1.238  |
|                                            | Setup[open]               | 0.337   | 0.095 | 3.55  | <b>0.001</b>     | 0.145   | 0.530  |
|                                            | Individual[1]             | 0.175   | 0.168 | 1.04  | 0.305            | -0.165  | 0.515  |
|                                            | Individual[3]             | 0.062   | 0.168 | 0.37  | 0.713            | -0.278  | 0.403  |
|                                            | Individual[5]             | -0.458  | 0.159 | -2.88 | <b>0.006</b>     | -0.780  | -0.137 |
|                                            | Individual[1]*Setup[open] | 0.054   | 0.168 | 0.32  | 0.751            | -0.286  | 0.394  |
|                                            | Individual[3]*Setup[open] | -0.201  | 0.168 | -1.19 | 0.240            | -0.541  | 0.140  |
|                                            | Individual[5]*Setup[open] | -0.047  | 0.159 | -0.3  | 0.767            | -0.369  | 0.274  |
| Max. Tail Acceleration (m/s <sup>2</sup> ) | Intercept                 | 31.839  | 4.175 | 7.63  | <b>&lt;.0001</b> | 23.394  | 40.284 |
|                                            | Setup[open]               | 11.414  | 4.175 | 2.73  | <b>0.009</b>     | 2.969   | 19.859 |
|                                            | Individual[1]             | 4.556   | 7.388 | 0.62  | 0.541            | -10.388 | 19.501 |
|                                            | Individual[3]             | 2.022   | 7.388 | 0.27  | 0.786            | -12.922 | 16.967 |
|                                            | Individual[5]             | -14.247 | 6.986 | -2.04 | <b>0.048</b>     | -28.376 | -0.117 |
|                                            | Individual[1]*Setup[open] | -0.634  | 7.388 | -0.09 | 0.932            | -15.579 | 14.310 |
|                                            | Individual[3]*Setup[open] | -3.624  | 7.388 | -0.49 | 0.627            | -18.568 | 11.321 |
|                                            | Individual[5]*Setup[open] | -1.689  | 6.986 | -0.24 | 0.810            | -15.818 | 12.441 |
| Max. Tail Distance (m)                     | Intercept                 | 7.474   | 0.677 | 11.04 | <b>&lt;.0001</b> | 0.061   | 0.088  |
|                                            | Setup[open]               | 2.934   | 0.677 | 4.33  | <b>&lt;.0001</b> | 0.016   | 0.043  |

|                         |                           |         |       |       |                  |         |         |
|-------------------------|---------------------------|---------|-------|-------|------------------|---------|---------|
|                         | Individual[1]             | 1.257   | 1.198 | 1.05  | 0.300            | -0.012  | 0.037   |
|                         | Individual[3]             | 0.578   | 1.198 | 0.48  | 0.632            | -0.018  | 0.030   |
|                         | Individual[5]             | -3.051  | 1.133 | -2.69 | <b>0.010</b>     | -0.053  | -0.008  |
|                         | Individual[1]*Setup[open] | -0.814  | 1.198 | -0.68 | 0.501            | -0.032  | 0.016   |
|                         | Individual[3]*Setup[open] | -0.549  | 1.198 | -0.46 | 0.649            | -0.030  | 0.019   |
|                         | Individual[5]*Setup[open] | -0.033  | 1.133 | -0.03 | 0.977            | -0.023  | 0.023   |
| Max. FA/V Ratio         | Intercept                 | 0.692   | 0.111 | 6.22  | <b>&lt;.0001</b> | 0.467   | 0.917   |
|                         | Setup[open]               | -0.379  | 0.111 | -3.41 | <b>0.0015</b>    | -0.604  | -0.154  |
|                         | Individual[1]             | 0.143   | 0.197 | 0.73  | 0.471            | -0.255  | 0.541   |
|                         | Individual[3]             | 0.180   | 0.197 | 0.91  | 0.366            | -0.218  | 0.578   |
|                         | Individual[5]             | -0.386  | 0.186 | -2.08 | <b>0.045</b>     | -0.763  | -0.010  |
|                         | Individual[1]*Setup[open] | -0.179  | 0.197 | -0.91 | 0.368            | -0.578  | 0.219   |
|                         | Individual[3]*Setup[open] | -0.065  | 0.197 | -0.33 | 0.742            | -0.463  | 0.333   |
|                         | Individual[5]*Setup[open] | 0.338   | 0.186 | 1.82  | 0.077            | -0.038  | 0.715   |
| % Strike > Slip Thresh. | Intercept                 | 22.563  | 2.085 | 10.82 | <b>&lt;.0001</b> | 18.347  | 26.780  |
|                         | Setup[open]               | -15.941 | 2.085 | -7.65 | <b>&lt;.0001</b> | -20.158 | -11.725 |
|                         | Individual[1]             | -0.240  | 3.689 | -0.07 | 0.949            | -7.701  | 7.222   |
|                         | Individual[3]             | 10.620  | 3.689 | 2.88  | <b>0.0064</b>    | 3.159   | 18.082  |
|                         | Individual[5]             | -14.174 | 3.488 | -4.06 | <b>0.0002</b>    | -21.229 | -7.120  |
|                         | Individual[1]*Setup[open] | -4.208  | 3.689 | -1.14 | 0.261            | -11.669 | 3.254   |
|                         | Individual[3]*Setup[open] | 3.671   | 3.689 | 1     | 0.326            | -3.790  | 11.133  |
|                         | Individual[5]*Setup[open] | 9.831   | 3.488 | 2.82  | <b>0.0075</b>    | 2.776   | 16.885  |



Supplementary Materials and Methods. Code used to process and analyze data.

```
clear all
```

```
data1 = dlmread('S3T7_7_7_21bpxypts.csv',',',1,0); %1 skips rows(top down) and skips 0 columns (left to right)
dataa = dlmread('S3T7_7_7_21.csv',',',1,0); %1 skips rows(top down) and skips 0 columns (left to right)
datam = dlmread('S3T7_7_7_21bptxypts.csv',',',1,0); %1 skips rows(top down) and skips 0 columns (left to right)
```

```
data2=data1;
datab=dataa;
datan=datam;
```

```
%Data 1 Manipulations:
```

```
%Load data
```

```
time = data2(:,[1]);
x = data2(:,[2]);
y = data2(:,[3]);
framerate = 500;
```

```
%Adjust values to 'zero' them
```

```
x1 = x-x(30);
y1 = y-y(30);
```

```
%Convert pixels to mm
```

```
x2 = x1/1.15;
y2 = y1/1.15;
```

```
%shift x and y axis to align with force sensor axis
```

```
xx = x2*cos(37)+y2*sin(37);
yy = -x2*sin(37)+y2*cos(37);
```

```
%SMOOTH BEFORE CALCULATING
```

```
[sp,sxx]=spaps(time,xx,0.5); %0.5 looked good
```

```
[sp,syy]=spaps(time,yy,0.5); %0.5 looked good
```

```
Vx=diff(sxx)*framerate; %where framerate = 500. If framerate is 1/500, use diff(x2)/framerate  
Vy=diff(syy)*framerate;  
Vxy=sqrt((Vx.^2)+(Vy.^2));
```

```
%Set 0
```

```
zero1=Vx*0;
```

```
timez = time*1;
```

```
%Get hypotenuse
```

```
h = sqrt((sxx.^2)+(syy.^2));
```

```
%Take derivative of position data revealing velocity
```

```
% vel = gradient(y2(:))./gradient(x2(:));
```

```
%
```

```
% vel1 = gradient(h(:))./gradient(time(:));
```

```
%
```

```
% vel2 = vel1/1000;
```

```
%Data a manipulations:
```

```
%Load data
```

```
timea = datab(:,[1]);
```

```
fx = datab(:,[2]);
```

```
fy = datab(:,[3]);
```

```
fz = datab(:,[4]);
```

```
%Zero time/forces
```

```
timeb = timea-timea(1);
```

```
fx1 = fx-fx(1);
```

```
fy1 = fy-fy(1);
```

```
fz1 = fz-fz(1);
```

```
%Get hypotenuse
```

```
ha = sqrt((fx1.^2)+(fy1.^2)+(fz1.^2));
```

```
%convert mm to m  
Vx1=Vx/1000;  
Vy1=Vy/1000;  
Vxy1=Vxy/1000;  
zero2 = timeb*0;
```

```
Forceint = trapz(ha(1:1683))/1000;
```

```
%differentiate velocity data to get acceleration data
```

```
Ax=diff(Vx1)*framerate; %where framerate = 500. If framerate is 1/500, use diff(x2)/framerate  
Ay=diff(Vy1)*framerate;  
Axy=sqrt((Ax.^2)+(Ay.^2));
```

```
%divide force data by mass to get acceleration data
```

```
Faccel = ha/0.830;
```

```
%aligning forces and position data to direction of strike 5 frames  
%after strike has begun
```

```
%shift x and y axis to align with strike direction
```

```
xa = x2*cos(141)+y2*sin(141); %strike is 75 deg off horiz  
ya = -x2*sin(141)+y2*cos(141); %%%WAS 141 for analysis, changed to 152 to test henry's hypoth.
```

```
%SMOOTH BEFORE CALCULATING
```

```
[sp,sxa]=spaps(time,xa,0.5); %0.5 looked good  
[sp,sya]=spaps(time,ya,0.5); %0.5 looked good
```

%differentiate position data to get velocity data

```
Vxa=diff(sxa)*framerate; %where framerate = 500. If framerate is 1/500, use diff(x2)/framerate
Vya=diff(sya)*framerate;
Vxya=sqrt((Vxa.^2)+(Vya.^2));
```

%convert to m/s vs mm/s

```
Vxb=Vxa/1000;
Vyb=Vya/1000;
Vxyb=Vxya/1000;
```

```
fx2=fx1*cos(104)+fy1*sin(104); %was 345.8
fy2=-fx1*sin(104)+fy1*cos(104);
fz2=fz1*(-1);
```

```
fxhyp = sqrt((fx2.^2)+(fy2.^2)+(fz1.^2));
```

```
fm=fx2;
fn=fy2;
```

%SMOOTH BEFORE CALCULATING

```
[sp,sfm]=spaps(timeb,fm,0.015); %0.5 looked good
[sp,sfn]=spaps(timeb,fn,0.015); %0.5 looked good
```

figure(1)

```
plot(timeb,fx2,','Color',[254,127,156]/255,'MarkerSize',5); %pink
hold on
plot(timeb,fy2,','Color',[135,206,235]/255,'MarkerSize',10); %light blue
plot(timeb,sfm,','Color',[255,0,0]/255,'MarkerSize',5); %red
plot(timeb,sfn,','Color',[0,0,255]/255,'MarkerSize',5); %blue
```

figure(2)

```
plot(time(31:304),Vxb,','Color',[255,0,0]/255,'MarkerSize',5); %red
```

```
hold on;
plot(time(31:304),Vyb,'.','Color',[0,0,255]/255,'MarkerSize',5); %blue
plot(time(31:304),Vxyb,'.','Color',[75,0,130]/255,'MarkerSize',5); %purple
plot(timeb,zero2,'-','Color',[0,0,0]/255,'MarkerSize',5);
plot(timeb,fxyhyp,'-','Color',[100,100,100]/255,'MarkerSize',5);
plot(timeb,-sfn,'.','Color',[254,127,156]/255,'MarkerSize',5); %pink
plot(timeb,sfm,'.','Color',[135,206,235]/255,'MarkerSize',5); %light blue
plot(timeb,fz2,'.','Color',[192,192,192]/255,'MarkerSize',5); %dk gray

line([0.16834,0.16834],[-3,14],'LineStyle',':','Color',[0,0,0]/255,'MarkerSize',5); %snake straight
line([0.19246,0.19246],[-3,14],'LineStyle','--','Color',[0,0,0]/255,'MarkerSize',5); %forward progress ends
line([0.41156,0.41156],[-3,14],'Color',[0,0,0]/255,'MarkerSize',5); %snake lands on platform

% xlim([0,1]);
% ylim([-3,14]);

[pks,locs]=findpeaks(Vxy1);

dist = sqrt(((x2(84)-x2(30))^2)+((y2(84)-y2(30))^2));
dist1 = sqrt(((x2(96)-x2(30))^2)+((y2(96)-y2(30))^2));
angle = (y2(locs(2)+30)-(y2(30)))/(x2(locs(2)+30)-(x2(30)))*(180/pi);

%Tail Data
%Load data
xn = datan(:,[1]);
yn = datan(:,[2]);

%Adjust values to 'zero' them
xo = xn-xn(30);
yo = yn-yn(30);

%Convert pixels to mm
xp = xo/1.257;
yp = yo/1.257;
```

```
%shift x and y axis to align with strike direction
xq = xp*cos(141)+yp*sin(141); %strike is 75 deg off horiz
yq = -xp*sin(141)+yp*cos(141);

%SMOOTH BEFORE CALCULATING
[sp,sxq]=spaps(time,xq,0.5); %0.5 looked good
[sp,syq]=spaps(time,yq,0.5); %0.5 looked good

%differentiate position data to get velocity data
Vxq=diff(sxq)*framerate; %where framerate = 500. If framerate is 1/500, use diff(x2)/framerate
Vyq=diff(syq)*framerate;
Vxyq=sqrt((Vxq.^2)+(Vyq.^2));

%convert mm/s to m/s
Vxr=Vxq/1000;
Vyr=Vyq/1000;
Vxyr=Vxyq/1000;

figure(3)
plot(time(31:305),Vxr,'.','Color',[255,0,0]/255,'MarkerSize',5); %red
hold on;
plot(time(31:305),Vyr,'.','Color',[0,0,255]/255,'MarkerSize',5); %blue
plot(time(31:305),Vxyr,'.','Color',[0,255,0]/255,'MarkerSize',5); %green
plot(timeb,zero2,'-','Color',[0,0,0]/255,'MarkerSize',5);

line([0.16834,0.16834],[-3,14],'LineStyle',':','Color',[0,0,0]/255,'MarkerSize',5); %snake straight
line([0.19246,0.19246],[-3,14],'LineStyle','--','Color',[0,0,0]/255,'MarkerSize',5); %forward progress ends
line([0.41156,0.41156],[-3,14],'Color',[0,0,0]/255,'MarkerSize',5); %snake lands on platform

%differentiate tail velocity data to get tail acceleration data

Axt=diff(Vxr)*framerate; %where framerate = 500. If framerate is 1/500, use diff(x2)/framerate
Ayt=diff(Vyr)*framerate;
```

```
Axyt=sqrt((Axt.^2)+(Ayt.^2));
```

```
figure(4)
```

```
plot(time(32:305),Axt,'.','Color',[255,0,0]/255,'MarkerSize',5); %red
```

```
hold on;
```

```
plot(time(32:305),Ayt,'.','Color',[0,0,255]/255,'MarkerSize',5); %blue
```

```
plot(time(32:305),Axyt,'.','Color',[0,255,0]/255,'MarkerSize',5); %green
```

```
plot(timeb,zero2,'-','Color',[0,0,0]/255,'MarkerSize',5);
```

```
line([0.16834,0.16834],[-3,14],'LineStyle',':','Color',[0,0,0]/255,'MarkerSize',5); %snake straight
```

```
line([0.19246,0.19246],[-3,14],'LineStyle','--','Color',[0,0,0]/255,'MarkerSize',5); %forward progress ends
```

```
line([0.41156,0.41156],[-3,14],'Color',[0,0,0]/255,'MarkerSize',5); %snake lands on platform
```

```
[pkstailvel,locs]=findpeaks(Vxvr);
```

```
[pkstailacc,locs]=findpeaks(Axyt);
```

```
dist_tail = sqrt(((xq(114)-xq(30))^2)+((yq(114)-yq(30))^2)); %was 96
```

```
dist_tailx = sqrt((xq(114)-xq(30))^2); %was 124
```

```
dist_taily = sqrt((yq(114)-yq(30))^2); %was 124
```

```
MaxTailVely = max(Vvr);
```

```
MinTailVely = min(Vvr);
```

```
MaxTailVelx = max(Vvr);
```

```
MinTailVelx = min(Vvr);
```

```
MaxTailAccely = max(Ayt);
```

```
MinTailAccely = min(Ayt);
```

```
MaxTailAccelx = max(Axt);
```

```
MinTailAccelx = min(Axt);
```

```
%forces
```

```
Fttl = sqrt((fx1.^2)+(fy1.^2)+((fz2+6.95).^2));
[sp,sft]=spaps(timea,fxhyp,0.5); %0.5 looked good
figure(5)
plot(timeb,zero2,'Color',[0,0,0]/255,'LineWidth',1);
hold on;
plot(timeb,Fttl,'Color',[147,20,255]/255,'LineWidth',2); %ttl force-gray/purple was 216,191,216
plot(timeb,fz2+6.95,'Color',[192,192,192]/255,'LineWidth',2); %gravity force-gray
plot(timeb,-sfn,'Color',[255,0,0]/255,'LineWidth',2); %forward force-pink, was 254,127,156
plot(timeb,sfm,'Color',[0,0,255]/255,'LineWidth',2); %lateral force-light blue,135,206,235

line([0.16834,0.16834],[-5,16],'LineStyle',':','Color',[0,0,0]/255,'MarkerSize',5); %snake straight
line([0.19246,0.19246],[-5,16],'LineStyle','--','Color',[0,0,0]/255,'MarkerSize',5); %forward progress ends
line([0.41156,0.41156],[-5,16],'Color',[0,0,0]/255,'MarkerSize',5); %snake lands on platform
line([0,0.2],[5.24,5.24],'LineStyle','-','Color',[0,0,0]/255,'MarkerSize',5); %body weight of snake in newtons

xlim([0.05,0.2]);
ylim([-5,16]);
ax=gca;
ax.FontSize=15;

%velocity
figure(6);
plot(time(31:304)+0.02,Vxb,'Color',[255,0,0]/255,'LineWidth',2); %forward vel-red
hold on;
plot(time(31:304)+0.02,Vyb,'Color',[0,0,255]/255,'LineWidth',2); %lat vel-blue, was 105,145,255
plot(time(31:304)+0.02,Vxyb,'Color',[147,20,255]/255,'LineWidth',2); %ttl vel-purple
plot(timeb,zero2,'-','Color',[0,0,0]/255,'MarkerSize',5);

% plot(time(31:304)+0.02,Vxr(1:274),'LineStyle',':','Color',[255,140,0]/255,'LineWidth',2); %tail dk orng
plot(time(31:304)+0.02,Vyr(1:274),'LineStyle','--','Color',[255,87,51]/255,'LineWidth',2); %tail light orng

line([0.16834,0.16834],[-3,4],'LineStyle',':','Color',[0,0,0]/255,'MarkerSize',5); %snake straight
line([0.19246,0.19246],[-3,4],'LineStyle','--','Color',[0,0,0]/255,'MarkerSize',5); %forward progress ends
```



```
line([0.41156,0.41156],[-3,4],'Color',[0,0,0]/255,'MarkerSize',5); %snake lands on platform

xlim([0.05,0.2]);
ylim([-3,4]);
ax=gca;
ax.FontSize=15;

%acceleration
figure(7);
plot(time(32:304)+0.02,-Ax,'Color',[255,0,0]/255,'LineWidth',2); %red,was 220,20,60
hold on;
plot(time(32:304)+0.02,Ay,'Color',[0,0,255]/255,'LineWidth',2); %blue
plot(time(32:304)+0.02,Axy,'Color',[147,20,255]/255,'LineWidth',2); %purple was 75,0,130
plot(timeb,zero2,'-', 'Color',[0,0,0]/255,'MarkerSize',5);
% plot(timeb,Faccel,'-', 'Color',[192,192,192]/255,'MarkerSize',5);

% plot(time(32:304)+0.02,Axt(2:274),'LineStyle',':','Color',[255,140,0]/255,'LineWidth',2); %tail accel dk orng
plot(time(32:304)+0.02,Ayt(2:274),'LineStyle','--','Color',[255,87,51]/255,'LineWidth',2); %tail accel dk orng

line([0.16834,0.16834],[-300,300],'LineStyle',':','Color',[0,0,0]/255,'MarkerSize',5); %snake straight
line([0.19246,0.19246],[-300,300],'LineStyle','--','Color',[0,0,0]/255,'MarkerSize',5); %forward progress ends
% line([0.41156,0.41156],[-300,300],'Color',[0,0,0]/255,'MarkerSize',5); %snake lands on platform

xlim([0.05,0.2]);
ylim([-300,300]);
ax=gca;
ax.FontSize=15;

%Redo Force Measurements

%force impulse (fore-aft)
Foreaftimpulse = trapz(sfn(1:1683))/1000;

%max ttl force
```

```
fz3 = fz2+6.95;
% fxyhypTtl = sqrt((fx2.^2)+(fy2.^2)+(fz3.^2));
fxyhypTtl = sqrt((fx2.^2)+(fy2.^2)+(fz3.^2));
[pksttlf,locs]=findpeaks(fxyhypTtl);

%max lateral force
[pkslatf,locs]=findpeaks(sfn);

%max vertical force
[pksvertf,locs]=findpeaks(fz3);

figure(8)
plot(timeb,zero2,'-', 'Color',[0,0,0]/255,'MarkerSize',5);
hold on;
plot(timeb,fxyhypTtl,'-', 'Color',[100,100,100]/255,'MarkerSize',5); %dkgray
plot(timeb,sfn,'-', 'Color',[135,206,235]/255,'MarkerSize',5); %light blue
plot(timeb,sfm,'-', 'Color',[254,127,156]/255,'MarkerSize',5); %pink
plot(timeb,fz3,'-', 'Color',[192,192,192]/255,'MarkerSize',5); %gray
% plot(timeb,fz2,'-', 'Color',[0,0,0]/255,'MarkerSize',5); % black

%Redo Fig. 5 with updated forces in BW
figure(9)
plot(timeb,zero2,'Color',[0,0,0]/255,'LineWidth',1);
hold on;
plot(timeb,Fttl/6.95,'Color',[147,20,255]/255,'LineWidth',2); %ttl force-gray/purple was 216,191,216
plot(timeb,(fz2+6.95)/6.95,'Color',[192,192,192]/255,'LineWidth',2); %gravity force-gray
plot(timeb,-sfn/6.95,'Color',[255,0,0]/255,'LineWidth',2); %forward force-pink, was 254,127,156
plot(timeb,sfm/6.95,'Color',[0,0,255]/255,'LineWidth',2); %lateral force-light blue,135,206,235

line([0.16834,0.16834],[-0.5,2.5],'LineStyle','-', 'Color',[0,0,0]/255,'MarkerSize',5); %snake straight
line([0.19246,0.19246],[-0.5,2.5],'LineStyle','--', 'Color',[0,0,0]/255,'MarkerSize',5); %forward progress ends
line([0.41156,0.41156],[-0.5,2.5],'Color',[0,0,0]/255,'MarkerSize',5); %snake lands on platform
line([0,0.2],[1,1],'LineStyle','-', 'Color',[0,0,0]/255,'MarkerSize',5); %body weight of snake in newtons
```

```
xlim([0.05,0.2]);  
% ylim([-5,16]);  
ax=gca;  
ax.FontSize=15;  
  
%Ratio test: fore-aft= -sfn; vertical= fz2  
sfn1 = sfn/6.95;  
fz21 = (fz2+6.95)/6.95;  
fz22 = transpose(fz21);  
  
Ratio = sfn1./fz22;  
  
figure(15);  
plot(timeb(1:7000),Ratio(1:7000),'Color',[152,29,151]/255,'LineWidth',1);  
line([0,0.3],[0.3,0.3],'LineStyle',':','Color',[0,0,0]/255,'MarkerSize',5); %snake straight  
  
xlim([0,0.3]);  
ylim([-1,1]);
```
